# Supplementary material for: Manganese-enhanced magnetic resonance imaging reveals light-induced brain asymmetry in embryo
Source: eLife. 2023 Sep 5;12:e86116. doi: 10.7554/eLife.86116 (PMC10479960; doi:10.7554/eLife.86116)
Supplement: Supplementary file 1. — All values are expressed in milliseconds. [file elife-86116-supp1.csv]

Egg	Exp.	Wulst L	Wulst R	Thal L	Thal R	TeO L	TeO R	Eye L	Eye R
42	dark	1036.1	1034.7	2005.4	1800.6	1255.1	1207.1	1163.3	1019.4
43	dark	526.3	503.2	1432.1	1343.9	695.9	683.7	531.5	576.2
60	dark	568.9	589.7	1544.1	1410.5	831.1	808	644.8	649.3
61	dark	741.9	736	1263	1222.4	1022.4	1036.1	863.5	873.8
62	dark	742.9	742.5	1740	1612.5	1108.6	1130.8	1020.4	983.6
63	dark	600.5	572.6	1745	1657.8	869.5	823.5	709.7	661.4
64	dark	540.1	538.5	1589.3	1513	792.2	706.7	625.7	553.1
65	dark	1366.3	1312.8	2391.8	2075.9	1518.7	1601.5	1451.9	1453.7
40	light	497.2	513.4	1567.3	1621.2	784.9	775.2	687.3	677.8
41	light	574.2	597.1	1292	1296	724.2	751.5	593.9	598.1
44	light	1165.3	1009.9	2871	2749	1450.2	1438.2	1303.7	1333.6
45	light	1667.5	1601.9	2906.6	2673.4	1825.9	1729.9	1681.8	1715.5
55	light	572.3	516.7	1620.1	1546.9	736.9	677.2	570.7	527.7
56	light	463.6	445.5	1252.1	1277.1	612.5	605.2	493.6	512.2
57	light	678	640.3	1478	1377	931.6	925.2	763.7	771.4
58	light	515.5	500.9	1382.9	1320.5	713.1	724	577.5	586.9
59	light	470.3	459.3	1271	1226	616.4	622.2	498	495.8
66	light	539	514.6	1462.7	1432.2	882.6	830.1	739.2	675.2
